# Supplementary material for: HPS4/SABRE regulates plant responses to phosphate starvation through antagonistic interaction with ethylene signalling
Source: PubMed Central journal article supplement — J Exp Bot. 2012 May 21;63(12):4527–38. doi: 10.1093/jxb/ers131 (PMC3421987; doi:10.1093/jxb/ers131), 2012-05-21
Supplement: supp_ers131_00078766-file001.pdf [file supp_ers131_00078766-file001.pdf]

Full title:

HPS4/SABRE regulates plant responses to phosphate starvation through antagonistic interaction with ethylene signalling

Full names of authors:

Hailan Yu, Nan Luo, Lichao Sun, and Dong Liu

Supplementary Figure S1

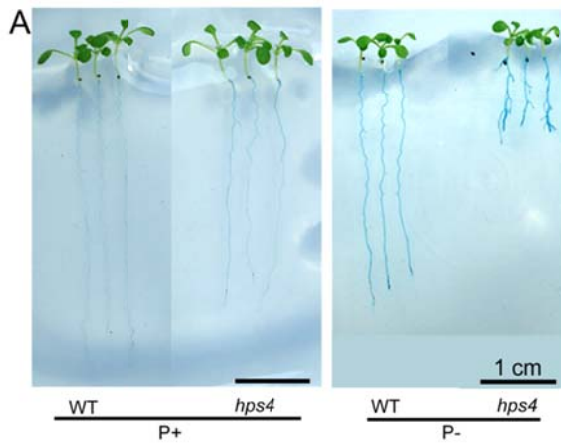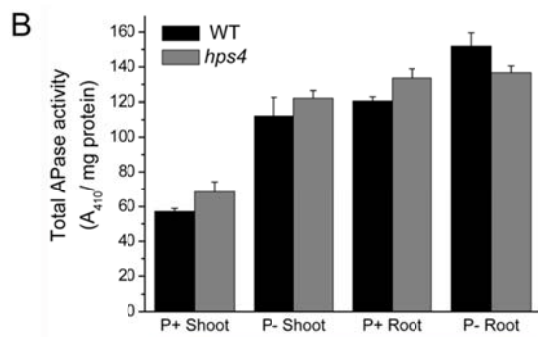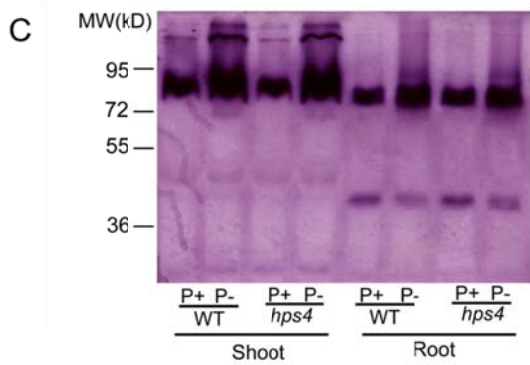

Supplementary Figure S2

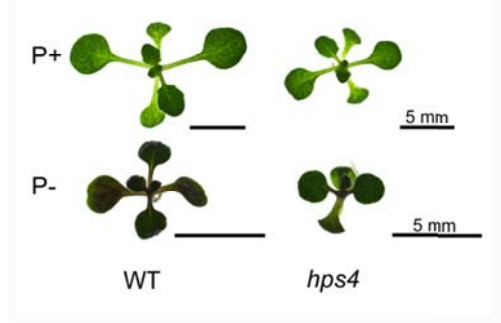

Supplementary Figure S3

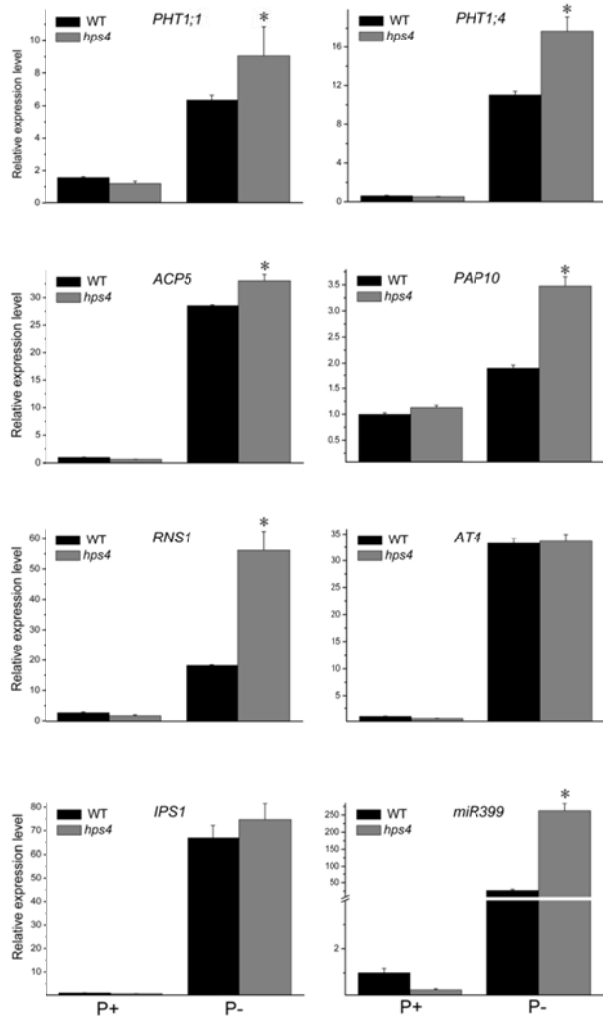

Supplementary Figure S4

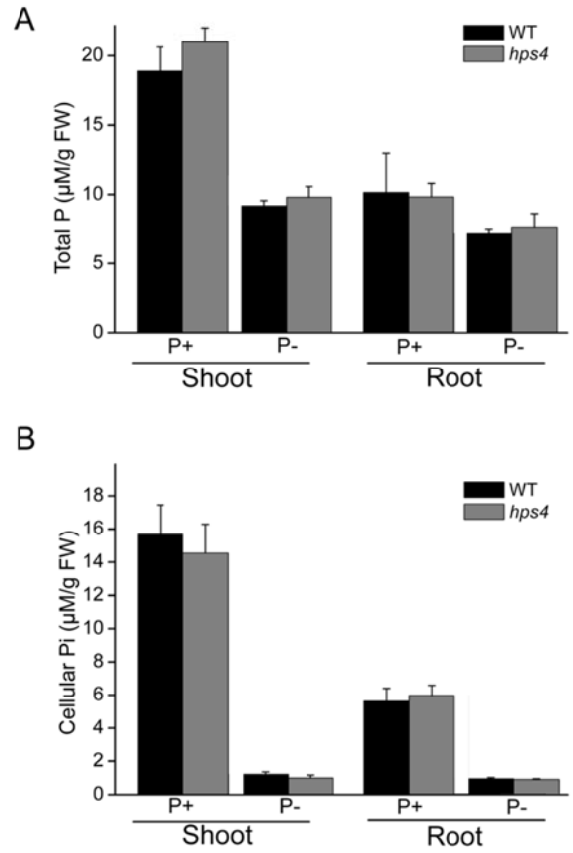

Supplementary Figure S5

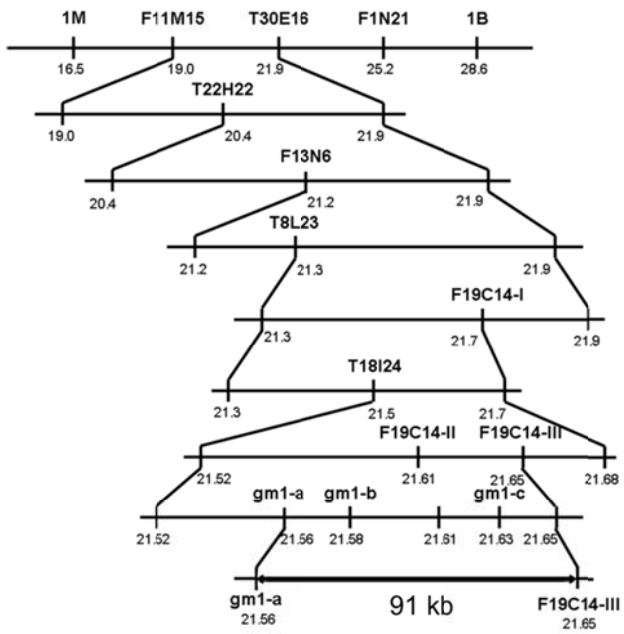

Supplementary Figure S6

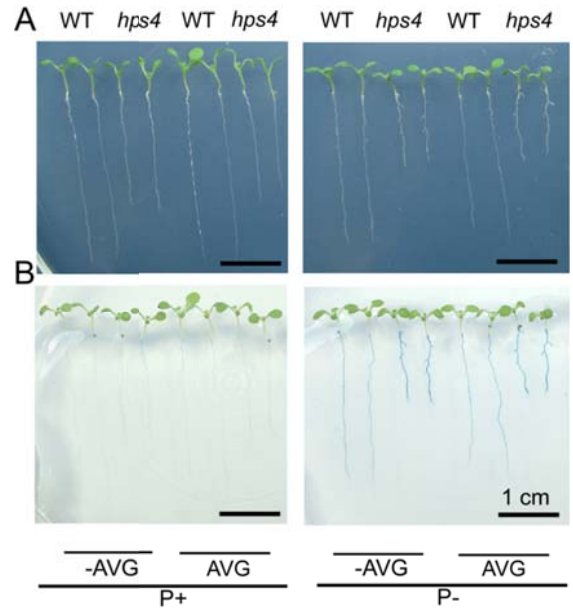

## Legends for Supplementary Figures

**Supplementary Fig. S1.** APase activity in 9-day-old WT and *hps4* seedlings grown on P+ and P- medium. (A) APase activity detected on the root surface by BCIP staining. (B) APase activity determined by quantitative analysis in total shoot and root extracts. (C) APase activity determined by in-gel enzyme assays. MW: Molecular weight.

**Supplementary Fig. S2.** Anthocyanin contents in 14-day-old WT and *hps4* seedlings grown on P+ and P- medium. *Arabidopsis* seeds were sown directly on P+ and P- medium, and the seedlings were photographed at 14 DAG.

**Supplementary Fig. S3.** Analysis of PSI gene expression in 9-day-old WT and *hps4* seedlings. The 9-day-old seedlings of the WT and *hps4* grown on P+ or P- medium were used for quantitative real-time PCR analysis. The names of the genes examined are indicated at the top of each panel. Values are the means and SD of three biological replicates and represent fold-changes normalized to transcript levels of the WT on P+ medium. Means with asterisks are significantly different from the WT ( $p < 0.05$ , two sample *t*-test).

**Supplementary Fig. S4.** Total phosphorus and cellular Pi contents in 9-day-old WT and *hps4* seedlings grown on P+ and P- medium. The experiments were repeated three times with similar results. Values represent the means and SD of three replicates. Means with asterisks are significantly different from the WT ( $p < 0.05$ , two sample *t*-

test).

**Supplementary Fig. S5.** The strategy for fine mapping of the *HPS4* gene. The molecular markers used in the fine mapping are shown along with their chromosomal positions. The numbers below each horizontal line are the AGI coordinate on the chromosome. Distance unit: Mb.

**Supplementary Fig. S6.** The effect of AVG treatment on primary root growth and APase activity of *hps4* and the WT. The seeds of the WT and *hps4* were directly sown on P<sup>+</sup> medium. At 3 DAG, the seedlings were transferred to P<sup>+</sup> and P<sup>-</sup> medium with or without addition of 0.2  $\mu$ M AVG. The seedling samples were photographed after growing another 4 days. (A) Morphology of the seedlings of the WT and *hps4* grown on Pi-sufficient (P<sup>+</sup>) and Pi-deficient (P<sup>-</sup>) medium. (B) Detection of APase activity by BCIP staining on the root surfaces of WT and *hps4* seedlings shown in (A).

**Supplementary Table 1.** Sequence of Primers used for map-based cloning

| BAC name | Primer name  | Primer sequence (5' to 3') |
|----------|--------------|----------------------------|
| F11M15   | F11M15-F     | GATTTGATTCGAGTCCGTAT       |
|          | F11M15-R     | TGTAGGGGAGAATGGAACC        |
| T22H22   | T22H22-F     | CAGAAAAAGAGATCAAGGGA       |
|          | T22H22-R     | ACCAAAAGAAGAGAGGGAG        |
| F13N6    | F13N6-F      | TCGTTGGACAGTCATAGGC        |
|          | F13N6-R      | CATCTGTTTCATCCGTCAAG       |
| T8L23    | T8L23-F      | GAAGAGACGGACAAGCATT        |
|          | T8L23-R      | GGGGTTGGTTTGTGTTT          |
| F19C14   | F19C14-F     | CCGTGGAGTGGTTGTGTC         |
|          | F19C14-R     | ATCCCAAGCCGAAACTAT         |
| T18I24   | T18I24-F     | TATGGAGTTTTTTTGGCG         |
|          | T18I24-R     | ATTATGCCATTGCTTGACA        |
| F19C14   | F19C14-II-F  | AACTGGATGGATTCGTGAT        |
|          | F19C14-II-R  | GCTACTTCGGTCAATCTTTT       |
| F19C14   | F19C14-III-F | GGGGACAAAACTTACTGG         |
|          | F19C14-III-R | CAAACAAGTGCAGAAATGG        |
|          | gm1-a-F      | AAAACCGCCTAAGCATCT         |
|          | gm1-a-R      | TCTCAAATCCCAATATCTC        |
|          | gm1-b-F      | ATGATGTGCCAATAAACCG        |
|          | gm1-b-R      | TCTTCAAATAATGGCGACTC       |
|          | gm1-c-F      | CGCCAATTACACACATCC         |
|          | gm1-c-R      | GTCGGTATCAAGGGCTAAC        |

**Supplementary Table 2.** Sequence of Primers used for quantitative real-time PCR

| Locus     | Gene           | Orientation | Primers sequence            |
|-----------|----------------|-------------|-----------------------------|
| AT3G18780 | <i>ACT2</i>    | F           | GACCTTGCTGGACGTGACCTTAC     |
|           |                | R           | GTAGTCAACAGCAACAAAGGAGAGC   |
| AT5G03545 | <i>At4</i>     | F           | TGGCCCCAAACACAAGAG          |
|           |                | R           | CGAACATTCACAATCATAATCTCC    |
| AT3G09922 | <i>IPS1</i>    | F           | AGACTGCAGAAGGCTGATTCAGA     |
|           |                | R           | TTGCCCAATTTCTAGAGGGAGA      |
| AT5G43350 | <i>PHT1;1</i>  | F           | TGATGATCTTGTGCTCTGTGCG      |
|           |                | R           | ATGACACCCTTGGCTTCGT         |
| AT2G38940 | <i>PHT1;4</i>  | F           | CGAAGCTCCTCGGTCGTAT         |
|           |                | R           | GGAGAGTCCCAGGCTTTTGT        |
| AT2G02990 | <i>RNS1</i>    | F           | TTGTTATCCAAATTCAGGCAA       |
|           |                | R           | AGTTAGGCCAAAGACCATGAAT      |
| AT2G34202 | <i>miR399</i>  | F           | AATACTCCTATGGCAGATCGCATTGG  |
|           |                | R           | TCCTTTGGCAGAGAAGCATTTTACTTG |
| AT3G17790 | <i>ACP5</i>    | F           | CTTAAGTCCTATTGCAGGCTAGGT    |
|           |                | R           | TTGCTAAAAATGATAGGGATGCT     |
| AT2G16430 | <i>PAP10</i>   | F           | ATCCTGTTGATGATTCTCCTTCTTG   |
|           |                | R           | ATTCATTTATTTGGACGTGACCTTAC  |
| AT1G25220 | <i>ASB1</i>    | F           | TTCTCAGATGTCTAGCGTTGGT      |
|           |                | R           | TTCTCCTTTGCCACGATCTC        |
| AT4G39950 | <i>CYP79B2</i> | F           | TGACGGATCCCAACAAAAAG        |
|           |                | R           | ATGATCGGCCATCCTGTG          |
| AT2G22330 | <i>CYP79B3</i> | F           | CCGTTGGCTACACGACAATA        |
|           |                | R           | TTGTAGAGCCAAGCGGTCA         |
| AT1G21430 | <i>YUC11</i>   | F           | TGCTCGGAACATTGCTAGAG        |
|           |                | R           | TGGAAAGCTTGTTCTTGCTG        |
| AT1G04180 | <i>YUC9</i>    | F           | GGGCTATGGAGGGTTAGAACA       |
|           |                | R           | ACCAACCACCGGCAAATA          |
| AT4G28720 | <i>YUC8</i>    | F           | CAAAACGTTCTTTTCGTTGTT       |
|           |                | R           | CGTTTTTGCCATAGAGAAGCA       |



| Locus     | Gene        | Orientation | Primers sequence         |
|-----------|-------------|-------------|--------------------------|
| AT2G33230 | <i>YUC7</i> | F           | GGTCGAGTTCTGCAGATTGAT    |
|           |             | R           | CCAATCTCACCCAAGTCGTT     |
| AT5G43890 | <i>YUC5</i> | F           | CAGCCAATCCTTTCCTTGTG     |
|           |             | R           | TGGAGGTCAGCTTGGATCTT     |
| AT5G11320 | <i>YUC3</i> | F           | CCATACCGGAGTTTCCACAT     |
|           |             | R           | TCCCTAAAGATTTCTGTGAGCTTC |
| AT4G13260 | <i>YUC2</i> | F           | TCCCTAAAGATTTCTGTGAGCTTC |
|           |             | R           | GGGTAAGTAGGGTAGCTTGAAGG  |
